# Supplementary figures and images for: Rapid analysis of matrix metalloproteinase-3 activity by gelatin arrays using a spectral surface plasmon resonance biosensor
Source: Royal Society of Chemistry journal article supplement (doi:10.1039/b919857a), 2010-01-01

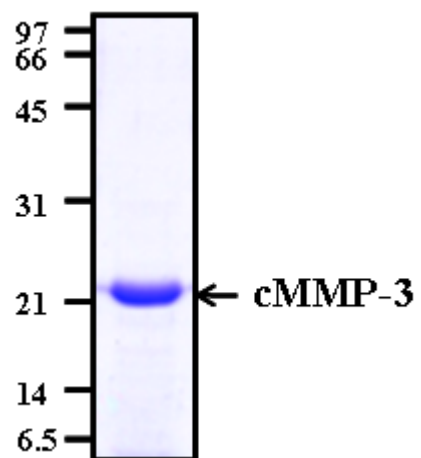

Fig. S1. Identification of solubilized cMMP-3 by SDS-PAGE

Supplement: b919857a.pdf [file b919857a.pdf]
